# Supplementary material
Source: PubMed Central journal article supplement (PMC6943354)
Supplement: ajcr0009-2730-f7.pdf [file ajcr0009-2730-f7.pdf]

## AKR1B10 protects hepatocytes from oxidative stress

**Supplementary Table 1.** Summary of oligo nucleotides sequences for constructing AKR1B10-shRNA plasmids

| Oligos       | Sequences                                                               |
|--------------|-------------------------------------------------------------------------|
| AKR1B10-sh1+ | 5'-GATCCGCAAGTGTGACTACCTCCACTCATTCAAGAGATGAGTGGAGGTAGTCACACTTTTTTTG-3'  |
| AKR1B10-sh1- | 5'-AATTCAAAAAAGTGTGACTACCTCCACTCATCTCTTGAATGAGTGGAGGTAGTCACACTTGCG-3'   |
| AKR1B10-sh2+ | 5'-GATCCGCAAGATCACAGTGAACCTAGTCTTCAAGAGAGACTAAGTTCACCTGTGATCTTTTTTTG-3' |
| AKR1B10-sh2- | 5'-AATTCAAAAAAGATCACAGTGAACCTAGTCTCTTGAAGACTAAGTTCACCTGTGATCTTGCG-3'    |

**Supplementary Table 2.** Primer sets for constructing luciferase-related plasmids

| Primer name     | Sequences                                                                 |
|-----------------|---------------------------------------------------------------------------|
| AKR1B10-luc-F   | Forward: 5'-CGGGGTACCAGATTCAACCAAAGCCAACCTCATC-3'                         |
| AKR1B10-luc-R   | Reverse: 5'-CCGCTCGAGGTAGAAGTCTCACGTCCTGCTCTC-3'                          |
| AKR1B10-luc-M-F | Forward: 5'-ccaacttttgctgtgtgaattGAAGAGTGAGCATGaacaagcagaaatccaatgatac-3' |
| AKR1B10-luc-M-R | Reverse: 5'-gtatcattggagtttctgttCATGCTCACTCTTCAaattcaacacagccaaagtgg-3'   |
| NRF-cDNA-F      | Forward: 5'-CGGGGTACCATGATGGACTTGGAGCTGC-3'                               |
| NRF-cDNA-R      | Reverse: 5'-CCGCTCGAGCTAGTTTTTCTTAACATCTGGCTTC-3'                         |

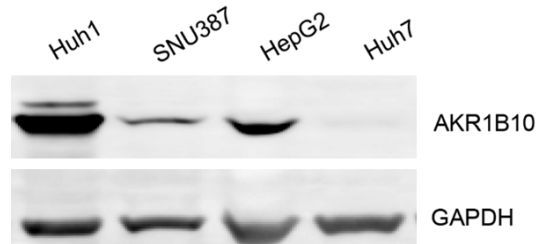

**Supplementary Figure 1.** AKR1B10 expression assay in four HCC cell lines including Huh1, SNU387, HepG2 and Huh7 by western blot.

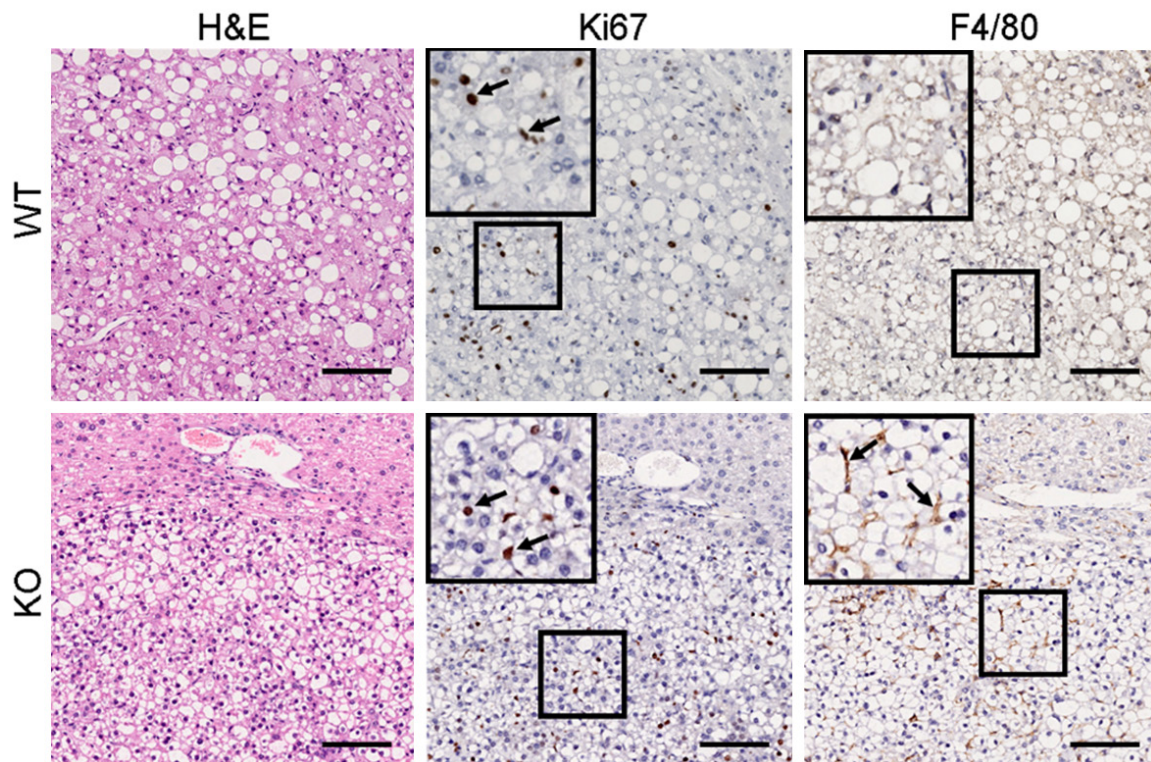

## AKR1B10 protects hepatocytes from oxidative stress

**Supplementary Figure 2.** H&E staining and IHC of Ki67, F4/80 in *Akr1b8* WT and KO mice after 9 months DEN treatment revealed more Kupffer cells infiltration in the tumor characterized by F4/80 signifying severe inflammatory response status in the *Akr1b8* KO mouse livers. H&E staining and IHC of Ki67 indicated the significant HCC development. The insets were high-magnification views. The arrows indicated positive staining. The scale bar is 100  $\mu$ m.

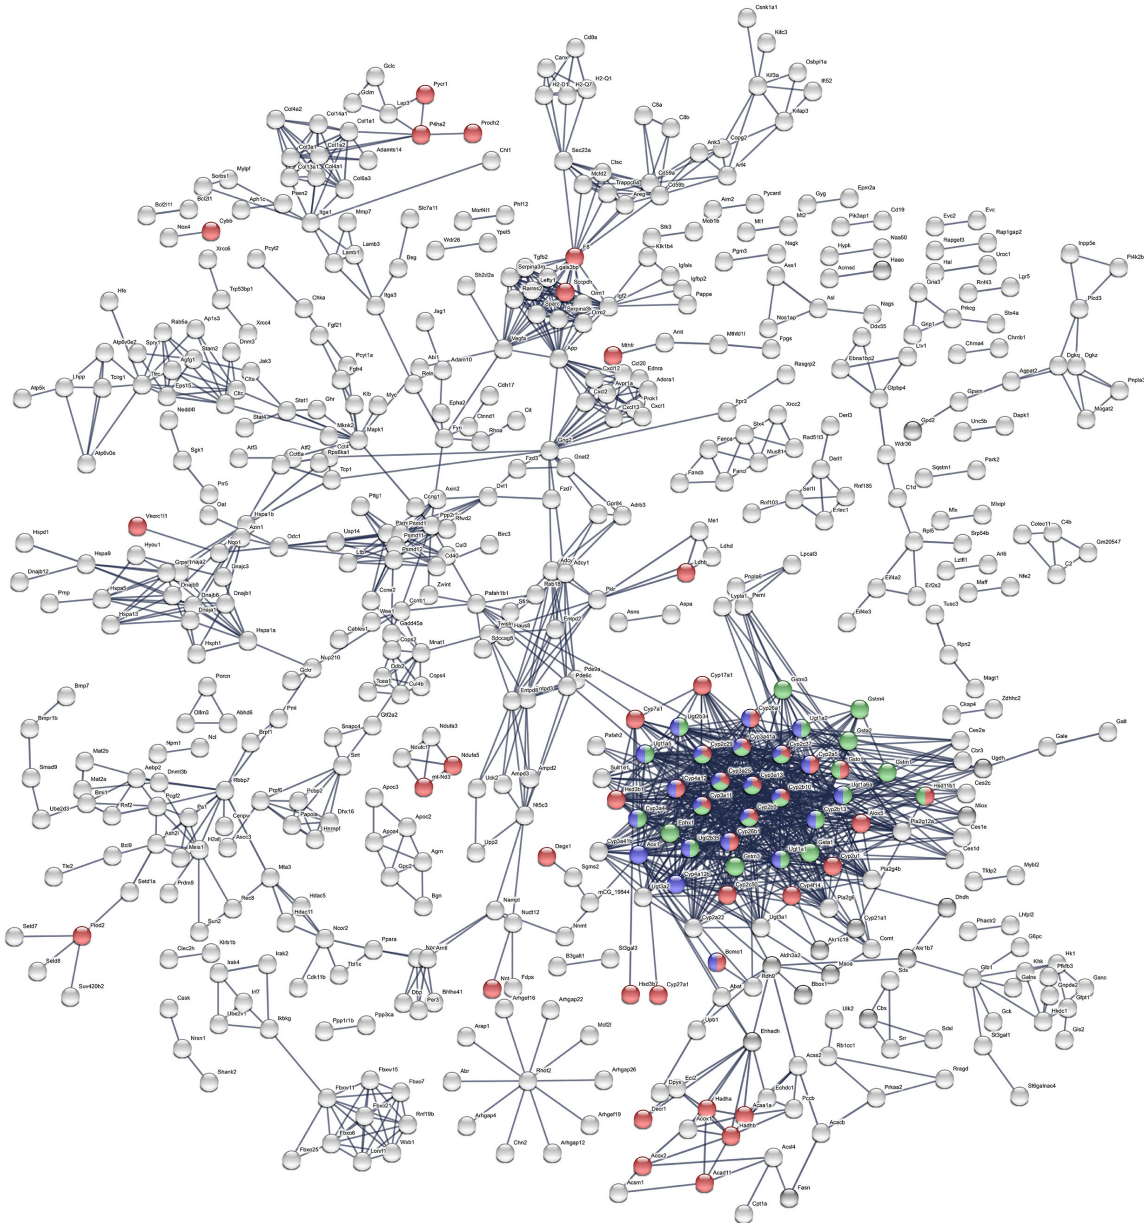

**Supplementary Figure 3.** Gene relative correlation network among the differently expressed genes in *Akr1b8* WT and KO liver tumors after 12 months DEN administration. The gene correlation network was depicted by the STRING database. Genes enriched in oxidoreductase activity, chemical carcinogenesis and retinol metabolism were indicated by red, blue and green color, respectively. The genes with more than one color indicated they were involved in different GO terms or KEGG pathways.

## AKR1B10 protects hepatocytes from oxidative stress

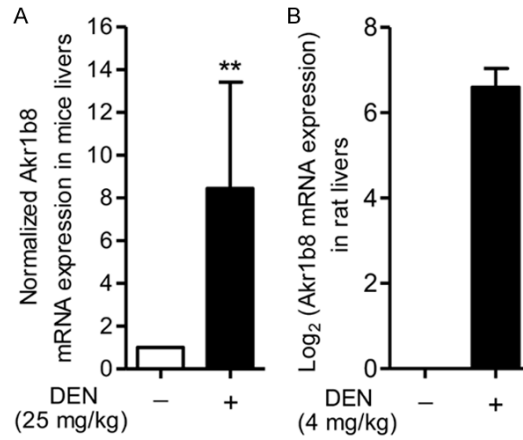

**Supplementary Figure 4.** Akkr1b8 expression assay in mouse or rat livers with or without DEN administration. A. Akkr1b8 mRNA expression assay in WT mice livers with (n=5) or without (n=6) DEN administration for 1 months by RT-qPCR. The mice were administrated with DEN at 25 mg/kg. Data shown are the mean  $\pm$  s.d. (\*P<0.05, \*\*P<0.01, Student's t-test, two-sided). B. Akkr1b8 mRNA expression assay using the data of whole transcript array on rat livers with (n=3) or without (n=3) DEN administration for 3 months from GEO database (ID: GSE123408). Data shown are the mean  $\pm$  s.d.

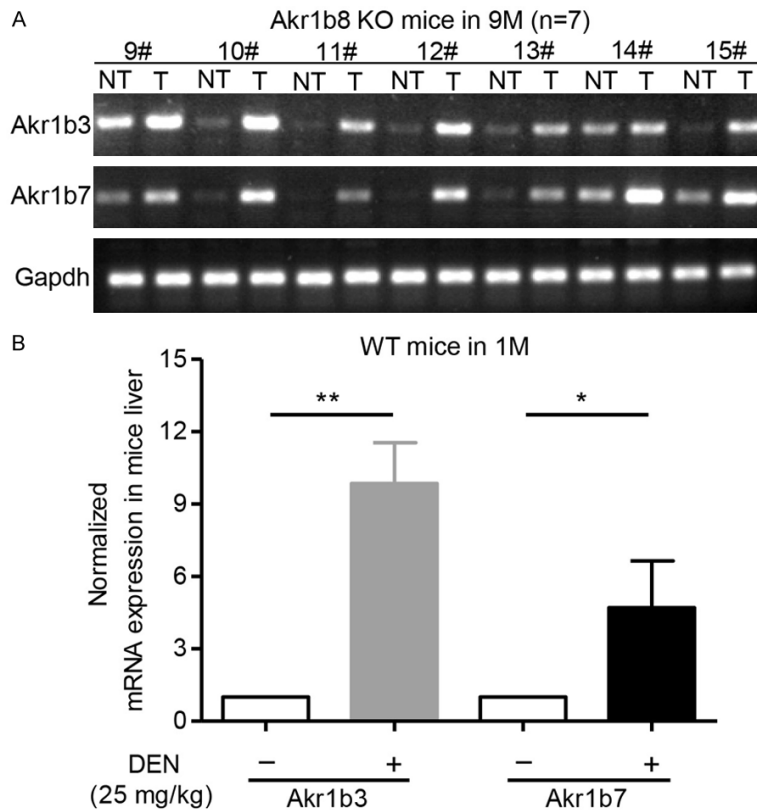

**Supplementary Figure 5.** The expression of another two members Akkr1b3 and Akkr1b7 in aldo-keto reductase superfamily in mice. A. Akkr1b3 and Akkr1b7 expression assays by RT-PCR in tumors (T) and matched non-tumor liver tissues (NT) in Akkr1b8 KO (n=7) mice after DEN administration for 9 months. B. Akkr1b3 and Akkr1b7 expression assays in Akkr1b8 WT mice livers upon DEN administration by RT-qPCR. The mice were treated with (n=5) or without (n=6) DEN for 1 month (\*P<0.05, \*\*P<0.01, Student's t-test, two-sided).

## AKR1B10 protects hepatocytes from oxidative stress

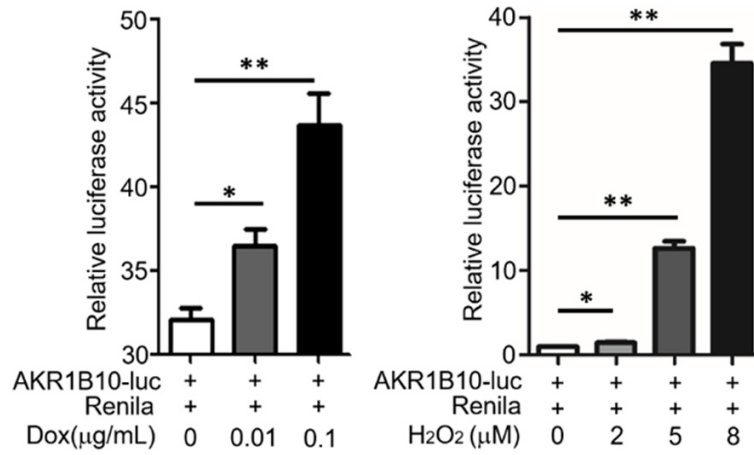

**Supplementary Figure 6.** Luciferase reporter assays showed hydrogen peroxide (H<sub>2</sub>O<sub>2</sub>) and doxorubicin (Dox) could increase AKR1B10 promoter activity. Data shown are the mean ± s.d. of three independent experiments (\*P<0.05, \*\*P<0.01, Student's t-test, two-sided).
